# Supplementary material for: Maternal metabolic determinants of accelerated infant weight gain in early life: assessing the combined effects of gestational diabetes and pre-pregnancy overweight
Source: Research Square preprint supplement (doi:10.21203/rs.3.rs-8677267/v1), 2026-02-22
Supplement: Supplementary file 2 [file 7653aa66dc07810f8e02afe0.docx]

Table S1 Exposure group effects across sensitivity analyses

| **Analysis** | **Effect** | ***β* (95% *CI*)** | ***P*** |
| --- | --- | --- | --- |
| Main analysis | Combined exposure (main) | 0.217 (0.176 , 0.258) | <0.001 |
| Main analysis | Combined exposure × age at infant follow-up | -0.017 (-0.023, -0.011) | <0.001 |
| Exclude axtreme WAZ (±3 SD) | Combined exposure (main) | 0.211 (0.170, 0.252) | <0.001 |
| Exclude axtreme WAZ (±3 SD) | Combined exposure × age at infant follow-up | -0.020 (-0.026, -0.014) | <0.001 |
| Complete cases | Combined exposure (Main) | 0.217 (0.176, 0.258) | <0.001 |
| Complete cases | Combined exposure × age at infant follow-up | -0.017 (-0.023, -0.011) | <0.001 |
| Random slope for age at infant follow-up | Combined exposure (main) | 0.227 (0.190, 0.264) | <0.001 |
| Random slope for age at infant follow-up | Combined exposure × age at infant follow-up | -0.017 (-0.027, -0.007) | <0.001 |
| Reference: OW only | Combined exposure (main) | 0.057 (0.010, 0.104) | 0.018 |
| Reference: OW only | Combined exposure × age at infant follow-up | -0.021 (-0.029, -0.013) | <0.001 |
