# Supplementary figures and images for: Maternal metabolic determinants of accelerated infant weight gain in early life: assessing the combined effects of gestational diabetes and pre-pregnancy overweight
Source: Research Square preprint supplement (doi:10.21203/rs.3.rs-8677267/v1), 2026-02-22

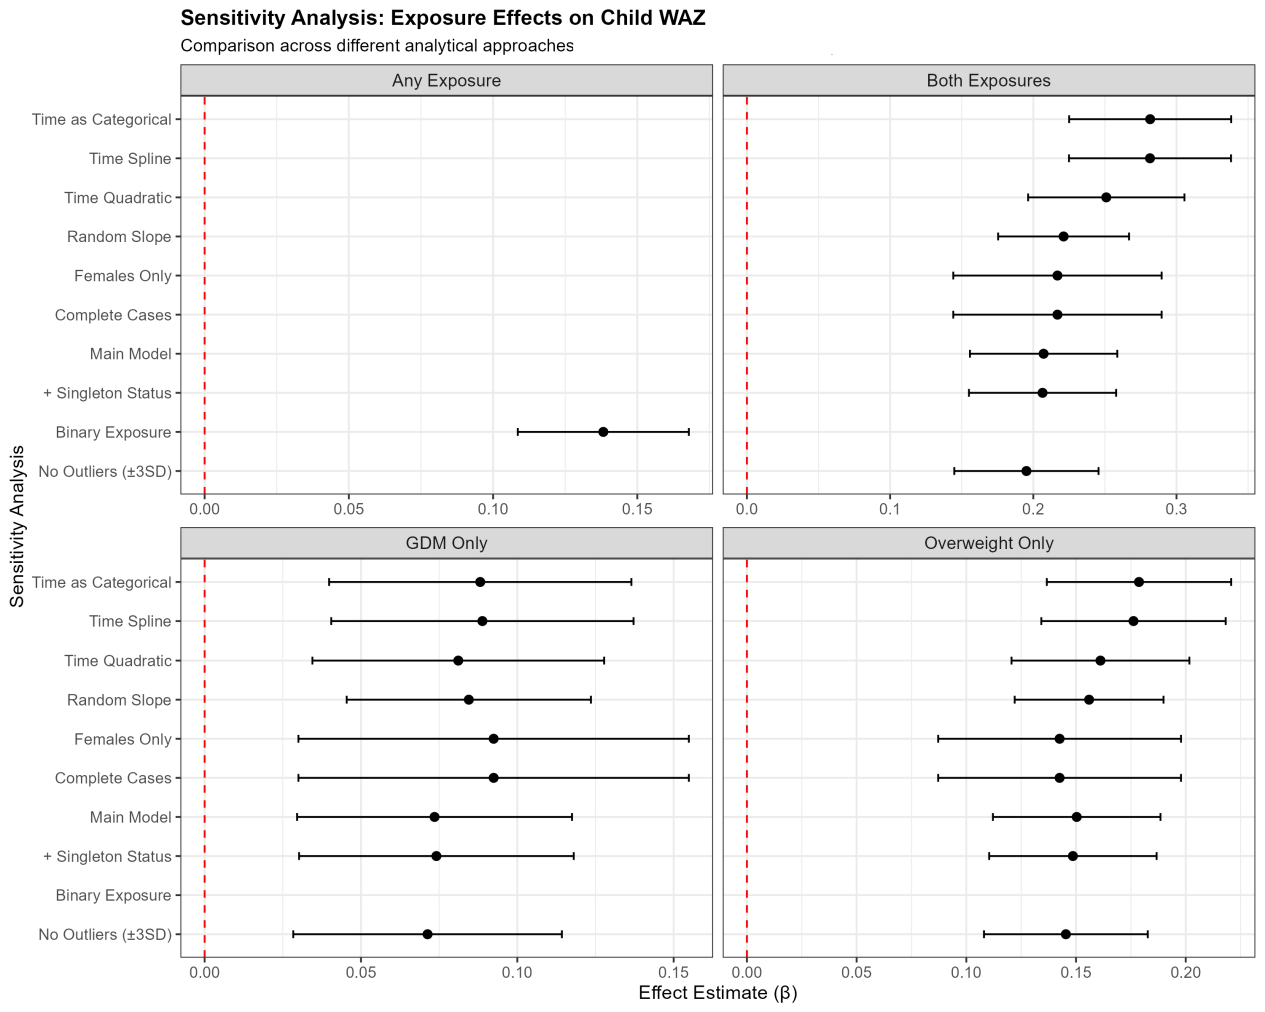


**Figure 2** Main effects of exposure groups on child WAZ across different analytical approaches

Supplement: Supplementary file 1 [file 47ad614a5603f50492fcf242.docx]
